# Supplementary material for: Socio-Emotional Experiences and Wellbeing of Deaf and Hard of Hearing Children and Their Parents before and during the COVID-19 Pandemic
Source: MDPI journal article supplement (doi:10.3390/children10071147), 2023-06-30
Supplement: s1 [file s1]

**Supplementary Table S1:** Child and family health, education, social and economic changes during the COVID-19 pandemic

| Measure                                                                                                           | Number of complete responses | Responses n=497 |
|-------------------------------------------------------------------------------------------------------------------|------------------------------|-----------------|
| <b>Child</b>                                                                                                      |                              |                 |
| <b>Health</b>                                                                                                     |                              |                 |
| Global physical health - n (%)                                                                                    | 490                          |                 |
| Excellent                                                                                                         |                              | 221 (45.1)      |
| Very good                                                                                                         |                              | 214 (43.7)      |
| Good                                                                                                              |                              | 47 (9.6)        |
| Fair                                                                                                              |                              | 5 (1.0)         |
| Poor                                                                                                              |                              | 3 (0.6)         |
| Global mental/emotional health prior to pandemic - n (%)                                                          | 490                          |                 |
| Excellent                                                                                                         |                              | 189 (38.6)      |
| Very good                                                                                                         |                              | 221 (45.1)      |
| Good                                                                                                              |                              | 66 (13.5)       |
| Fair                                                                                                              |                              | 12 (2.5)        |
| Poor                                                                                                              |                              | 2 (0.4)         |
| COVID-19 infection – n (%)                                                                                        | 490                          | 0 (0)           |
| <b>Education</b>                                                                                                  | 471                          |                 |
| Not in formal care/education                                                                                      |                              | 54 (11.5)       |
| Childcare, family day care, pre-school                                                                            |                              | 102 (22.0)      |
| 4-year old kindergarten program                                                                                   |                              | 46 (10.0)       |
| Primary school                                                                                                    |                              | 222 (47.0)      |
| High school                                                                                                       |                              | 46 (10.0)       |
| Vocational                                                                                                        |                              | 1 (0.5)         |
| <b>School type</b>                                                                                                | 269                          |                 |
| Mainstream                                                                                                        |                              | 186 (69.0)      |
| Mainstream school with HL special unit                                                                            |                              | 46 (17.0)       |
| School for children with HL                                                                                       |                              | 10 (4.0)        |
| Special school for children with disabilities                                                                     |                              | 23 (8.5)        |
| Other                                                                                                             |                              | 4 (1.5)         |
| <b>Preschool type</b>                                                                                             | 148                          |                 |
| Mainstream program                                                                                                |                              | 124 (84.0)      |
| Mainstream with special program                                                                                   |                              | 7 (4.5)         |
| Setting for children with HL                                                                                      |                              | 13 (9.0)        |
| Other                                                                                                             |                              | 4 (2.5)         |
| <b>Education changes/impacts (pre-schooler's)</b>                                                                 |                              |                 |
| Preschool learning arrangements have changed, n (%)                                                               | 148                          |                 |
| No, continues to attend childcare/kinder                                                                          |                              | 60 (40.5)       |
| No, continues to stay at home                                                                                     |                              | 12 (8.1)        |
| Yes, was at childcare/kinder, is now at home                                                                      |                              | 31 (21.0)       |
| Yes, was at home, has returned to childcare/kinder                                                                |                              | 45 (30.4)       |
| <b>How often has looking after your child made it difficult to do paid work/domestic duties (pre-schooler's)?</b> | 88                           |                 |
| Almost never                                                                                                      |                              | 7 (8.0)         |
| Rarely                                                                                                            |                              | 6 (6.8)         |
| Sometimes                                                                                                         |                              | 36 (40.9)       |
| Often                                                                                                             |                              | 26 (30.0)       |
| Almost always                                                                                                     |                              | 13 (14.8)       |

|                                                                                                                                                                                                                                                                                                                                      |     |                                                                            |
|--------------------------------------------------------------------------------------------------------------------------------------------------------------------------------------------------------------------------------------------------------------------------------------------------------------------------------------|-----|----------------------------------------------------------------------------|
| How often have you felt stressed or overwhelmed looking after your child at home while doing paid work/domestic duties (pre-schooler's)?<br>Almost never<br>Rarely<br>Sometimes<br>Often<br>Almost always                                                                                                                            | 88  | 4 (4.6)<br>11 (12.5)<br>42 (47.7)<br>24 (27.3)<br>7 (8.0)                  |
| <b>Education changes/impacts (primary/secondary school)</b><br>Child's primary or secondary school learning arrangements have changed<br>No, has continued to attend their primary or secondary school<br>No, continues to learn at home<br>Yes, is now learning at home<br>Yes, was learning at home but has now returned to school | 269 | 12 (4.5)<br>41 (15.2)<br>77 (28.6)<br>139 (51.7)                           |
| Usual classes are session                                                                                                                                                                                                                                                                                                            | 151 | 128 (84.8)                                                                 |
| Child doing remote learning while being supervised at school                                                                                                                                                                                                                                                                         | 151 | 26 (17.2)                                                                  |
| Classes being conducted remotely                                                                                                                                                                                                                                                                                                     | 118 | 99 (83.9)                                                                  |
| There are assignments for child to complete                                                                                                                                                                                                                                                                                          | 118 | 111 (94.1)                                                                 |
| Child has easy access to the internet and a computer/device                                                                                                                                                                                                                                                                          | 118 | 117 (99.1)                                                                 |
| Child has contact with their teacher by phone/video                                                                                                                                                                                                                                                                                  | 118 | 91 (77.1)                                                                  |
| Child has contact with classmates by phone/video                                                                                                                                                                                                                                                                                     | 118 | 91 (77.1)                                                                  |
| <b>Child education impacts</b>                                                                                                                                                                                                                                                                                                       |     |                                                                            |
| How much did/does your child enjoy and engage with his/her learning from home activities?<br>Almost never<br>Rarely<br>Sometimes<br>Often<br>Almost always                                                                                                                                                                           | 286 | 9 (3.2)<br>38 (13.3)<br>101 (35.3)<br>86 (30.1)<br>52 (18.2)               |
| Has it been difficult for your child to participate in learning from home because of his/her hearing loss?<br>Almost never<br>Rarely<br>Sometimes<br>Often<br>Almost always                                                                                                                                                          | 286 | 108 (37.8)<br>55 (19.2)<br>86 (30.1)<br>22 (7.7)<br>15 (5.2)               |
| <b>Child social changes</b>                                                                                                                                                                                                                                                                                                          |     |                                                                            |
| Number of non-household contacts child had in-person conversation with in last 2 weeks, mean (SD) [Range]                                                                                                                                                                                                                            | 449 | 7.9 (8.2) [0-40]                                                           |
| How much time has your child spent going outside of the home (e.g., shopping, exercise, appointments, school etc.)?<br>Not at all<br>1-2 days per week<br>A few days per week<br>Several days per week<br>Every day<br>Several times a day                                                                                           | 449 | 61 (13.6)<br>115 (25.6)<br>72 (16.0)<br>90 (20.0)<br>102 (22.7)<br>9 (2.0) |

|                                                                                                                                                                                                           |     |                                                                |
|-----------------------------------------------------------------------------------------------------------------------------------------------------------------------------------------------------------|-----|----------------------------------------------------------------|
| How stressful have the restrictions on leaving home been for your child?<br>Not at all<br>Slightly<br>Moderately<br>Very<br>Extremely                                                                     | 449 | 141 (31.4)<br>144 (32.1)<br>103 (22.9)<br>41 (9.1)<br>20 (4.5) |
| Have your child's contacts with people outside of your home changed relative to before the Coronavirus/COVID-19 pandemic?<br>A lot less<br>A little less<br>About the same<br>A little more<br>A lot more | 449 | 182 (40.5)<br>64 (14.3)<br>53 (11.8)<br>57 (12.7)<br>93 (20.7) |
| How much difficulty has your child had following the recommendations for keeping away from close contact with people?<br>None<br>A little<br>Moderate<br>A lot<br>A great amount                          | 449 | 103 (22.9)<br>143 (31.9)<br>99 (22.1)<br>63 (14.0)<br>41 (9.1) |
| Has the quality of the relationship between you and your child changed?<br>A lot worse<br>A little worse<br>About the same<br>A little better<br>A lot better                                             | 448 | 5 (1.1)<br>51 (11.4)<br>280 (62.5)<br>77 (17.2)<br>35 (7.8)    |
| How stressful have these changes in family relationships been for your child?<br>Not at all<br>Slightly<br>Moderately<br>Very<br>Extremely                                                                | 448 | 221 (49.3)<br>128 (28.6)<br>55 (12.3)<br>28 (6.3)<br>16 (3.6)  |
| Has the quality of your child's relationships with his/her friends or extended family changed?<br>A lot worse<br>A little worse<br>About the same<br>A little better<br>A lot better                      | 448 | 27 (6.0)<br>133 (29.7)<br>270 (60.3)<br>10 (2.2)<br>8 (1.8)    |
| How stressful have these changes in social relationships been for your child?<br>Not at all<br>Slightly<br>Moderately<br>Very<br>Extremely                                                                | 448 | 162 (36.2)<br>161 (35.9)<br>76 (17.0)<br>38 (8.5)<br>11 (2.5)  |

|                                                                                                                                                                                                |     |                                                                 |
|------------------------------------------------------------------------------------------------------------------------------------------------------------------------------------------------|-----|-----------------------------------------------------------------|
| How much has cancellation of important events (such as birthdays, holidays etc.) in your child's life been difficult for him/her?<br>Not at all<br>Slightly<br>Moderately<br>Very<br>Extremely | 448 | 113 (25.2)<br>151 (33.7)<br>102 (22.8)<br>60 (13.4)<br>22 (4.9) |
| To what degree is your child concerned about the stability of your living situation?<br>Not at all<br>Slightly<br>Moderately<br>Very<br>Extremely                                              | 257 | 188 (73.2)<br>39 (15.2)<br>21 (8.2)<br>6 (2.3)<br>3 (1.2)       |
| Did your child worry whether your food would run out because of a lack of money?<br>Yes<br>No                                                                                                  | 257 | 17 (6.6)<br>240 (93.4)                                          |
| How hopeful is your child that the COVID-19 pandemic, and the resulting changes to daily life will end soon?<br>Not at all<br>Slightly<br>Moderately<br>Very<br>Extremely                      | 257 | 25 (9.7)<br>34 (13.2)<br>71 (27.6)<br>89 (34.6)<br>38 (14.8)    |
| <b>Child worries/changes in last 2 weeks (primary/high school)</b>                                                                                                                             |     |                                                                 |
| Child worried about becoming infected<br>Not at all<br>Slightly<br>Moderately<br>Very<br>Extremely                                                                                             | 296 | 177 (59.8)<br>87 (29.4)<br>24 (8.1)<br>8 (2.7)<br>0 (0)         |
| Child worried about friends or family being infected<br>Not at all<br>Slightly<br>Moderately<br>Very<br>Extremely                                                                              | 296 | 173 (58.5)<br>86 (29.1)<br>25 (8.5)<br>11 (3.7)<br>1 (0.3)      |
| Child worried about their physical health being influenced by Coronavirus/COVID-19?<br>Not at all<br>Slightly<br>Moderately<br>Very<br>Extremely                                               | 296 | 217 (73.3)<br>53 (17.9)<br>18 (6.1)<br>8 (2.7)<br>0 (0)         |
| Child worried about their Mental/Emotional health being influenced by Coronavirus/COVID-19?<br>Not at all<br>Slightly<br>Moderately<br>Very<br>Extremely                                       | 296 | 190 (64.2)<br>69 (23.3)<br>29 (9.8)<br>5 (1.7)<br>3 (1.0)       |

|                                                                                                                                                                                                 |     |                                                              |
|-------------------------------------------------------------------------------------------------------------------------------------------------------------------------------------------------|-----|--------------------------------------------------------------|
| How much is your child asking questions, reading, or talking about Coronavirus/COVID-19?<br>Never<br>Rarely<br>Occasionally<br>Often<br>Most of the time                                        | 296 | 42 (14.2)<br>79 (26.7)<br>120 (40.5)<br>48 (16.2)<br>7 (2.4) |
| Has the COVID-19 pandemic, and the resulting changes to daily life led to any positive changes in your child's life?<br>None<br>Only a few<br>Some                                              | 443 | 125 (28.2)<br>176 (39.7)<br>142 (32.1)                       |
| <b>Parent/family</b>                                                                                                                                                                            |     |                                                              |
| Affected by bushfires in 2019/2020 summer<br>Yes<br>No, but extended family were<br>No                                                                                                          |     | 6 (1.0)<br>22 (5.0)<br>414 (94.0)                            |
| Parent COVID-19 infection suspected<br>No<br>Yes, waiting for test result<br>Yes, a positive test result<br>Yes, a negative test result<br>Rather not say                                       | 490 | 442 (90.2%)<br>1 (0.2%)<br>1 (0.2%)<br>44 (9%)<br>2 (0.4%)   |
| Global physical health - mean (SD)<br>Excellent<br>Very good<br>Good<br>Fair<br>Poor                                                                                                            | 316 | 89 (28.2)<br>134 (42.2)<br>80 (25.3)<br>12 (3.8)<br>1 (0.3)  |
| Number of people currently living in home - mean (SD)                                                                                                                                           | 442 | 4.3 (1.1)                                                    |
| <b>Parent difficulties</b>                                                                                                                                                                      |     |                                                              |
| Tending to child's learning at home made it difficult to do paid work and/or domestic duties<br>Almost never<br>Rarely<br>Sometimes<br>Often<br>Almost always                                   | 257 | 32 (12.5)<br>17 (6.6)<br>64 (24.9)<br>68 (26.5)<br>76 (29.6) |
| How often did you feel stressed or overwhelmed tending to your child's learning at home while doing paid work/domestic duties?<br>Almost never<br>Rarely<br>Sometimes<br>Often<br>Almost always | 257 | 25 (9.7)<br>23 (9.0)<br>83 (32.3)<br>74 (28.8)<br>52 (20.2)  |
| <b>Social changes</b>                                                                                                                                                                           |     |                                                              |
| Number of non-household contacts had in-person conversation with in last 2 weeks - mean (SD) [Range]                                                                                            | 438 | 11.2 (16.3) [0-200]                                          |

|                                                                                                                                                                                                                         |     |                                                                           |
|-------------------------------------------------------------------------------------------------------------------------------------------------------------------------------------------------------------------------|-----|---------------------------------------------------------------------------|
| Time spent going outside of the home (e.g., shopping, exercise, appointments, work, school etc.)<br>Not at all<br>1-2 days per week<br>A few days per week<br>Several days per week<br>Every day<br>Several times a day | 440 | 17 (3.9)<br>137 (31.1)<br>90 (20.5)<br>82 (18.6)<br>107 (24.3)<br>7 (1.6) |
| How stressful have the restrictions on leaving home been?<br>Not at all<br>Slightly<br>Moderately<br>Very<br>Extremely                                                                                                  | 440 | 71 (16.1)<br>180 (40.9)<br>107 (24.3)<br>62 (14.1)<br>20 (4.6)            |
| Have your contacts with people outside of your home changed relative to before the Coronavirus/COVID-19 pandemic?<br>A lot less<br>A little less<br>About the same<br>A little more<br>A lot more                       | 439 | 167 (38.0)<br>83 (18.9)<br>66 (15.0)<br>50 (11.4)<br>73 (16.6)            |
| How much difficulty have you had following the recommendations for keeping away from close contact with people?<br>None<br>A little<br>Moderate<br>A lot<br>A great amount                                              | 439 | 156 (35.5)<br>167 (38.0)<br>64 (14.6)<br>44 (10.0)<br>8 (1.8)             |
| Has the quality of the relationship between you and your partner changed?<br>A lot worse<br>A little worse<br>About the same<br>A little better<br>A lot better                                                         | 439 | 14 (3.2)<br>60 (13.7)<br>285 (64.9)<br>59 (13.4)<br>21 (4.8)              |
| How stressful have these changes in your relationship been for you?<br>Not at all<br>Slightly<br>Moderately<br>Very<br>Extremely                                                                                        | 439 | 230 (52.4)<br>114 (26.0)<br>64 (14.6)<br>19 (14.3)<br>12 (2.7)            |
| Has the quality of the relationship between you and your children changed?<br>A lot worse<br>A little worse<br>About the same<br>A little better<br>A lot better                                                        | 439 | 7 (1.6)<br>50 (11.4)<br>238 (54.2)<br>114 (26.0)<br>30 (6.8)              |

|                                                                                                                                                                                                              |     |                                                                               |
|--------------------------------------------------------------------------------------------------------------------------------------------------------------------------------------------------------------|-----|-------------------------------------------------------------------------------|
| How stressful have these changes in family relationships been for you?<br>Not at all<br>Slightly<br>Moderately<br>Very<br>Extremely                                                                          | 439 | 211 (48.1)<br>128 (29.2)<br>67 (15.3)<br>23 (5.2)<br>10 (2.3)                 |
| Has the quality of your relationships with friends or extended family changed?<br>A lot worse<br>A little worse<br>About the same<br>A little better<br>A lot better                                         | 439 | 12 (2.7)<br>119 (27.1)<br>283 (64.5)<br>19 (4.3)<br>6 (1.4)                   |
| How stressful have these changes in social contacts been for you?<br>Not at all<br>Slightly<br>Moderately<br>Very<br>Extremely                                                                               | 439 | 153 (34.9)<br>150 (34.2)<br>93 (23.2)<br>36 (8.2)<br>7 (1.6)                  |
| <b>Positive social changes</b>                                                                                                                                                                               |     |                                                                               |
| How much has the COVID-19 pandemic, and the resulting changes to daily life, led to positive changes in your family and your community?<br>Not at all<br>Very little<br>Somewhat<br>Quite a lot<br>Very much | 439 | 50 (11.4)<br>123 (28.0)<br>192 (43.7)<br>63 (14.4)<br>11 (2.5)                |
| Why?<br>More quality time with family<br>Less busy<br>People looking out for each other<br>Greater community outreach<br>Environment less polluted<br>Other                                                  | 497 | 237 (47.7)<br>152 (30.6)<br>110 (22.1)<br>52 (10.5)<br>133 (26.8)<br>26 (5.2) |
| How hopeful are you that the COVID-19 pandemic, and the resulting changes to daily life, will end soon?<br>Not at all<br>Slightly<br>Moderately<br>Very<br>Extremely                                         | 439 | 35 (8.0)<br>97 (22.1)<br>150 (34.2)<br>100 (22.8)<br>57 (13.0)                |
| <b>Changes to work and family finances</b>                                                                                                                                                                   |     |                                                                               |

|                                                                                                                             |     |            |
|-----------------------------------------------------------------------------------------------------------------------------|-----|------------|
| Are you currently working or studying? (select all that apply)                                                              | 497 |            |
| Working for pay                                                                                                             |     | 216 (43.5) |
| On leave                                                                                                                    |     | 27 (5.4)   |
| Working usual hours                                                                                                         |     | 118 (23.7) |
| Working reduced hours during the COVID-19 pandemic                                                                          |     | 49 (9.9)   |
| Stood down from work during the COVID-19 pandemic                                                                           |     | 19 (3.8)   |
| Lost job during the COVID-19 pandemic                                                                                       |     | 9 (1.8)    |
| Unemployed and looking for a job                                                                                            |     | 14 (2.8)   |
| Retired                                                                                                                     |     | 0 (0)      |
| Staying at home / homemaker                                                                                                 |     | 121 (24.4) |
| Disabled                                                                                                                    |     | 1 (0.2)    |
| Enrolled in school/college/university                                                                                       |     | 32 (6.4)   |
| Where are you working? (Select all that apply)                                                                              | 247 |            |
| Still going to my workplace                                                                                                 |     | 112 (45.3) |
| Working from home                                                                                                           |     | 135 (54.7) |
| Is your partner currently working or studying? (select all that apply)                                                      | 497 |            |
| Working for pay                                                                                                             |     | 233 (46.9) |
| On leave                                                                                                                    |     | 3 (0.6)    |
| Working usual hours                                                                                                         |     | 160 (32.2) |
| Working reduced hours during the COVID-19 pandemic                                                                          |     | 58 (11.7)  |
| Stood down from work during the COVID-19 pandemic                                                                           |     | 16 (3.2)   |
| Lost job during the COVID-19 pandemic                                                                                       |     | 11 (2.2)   |
| Unemployed and looking for a job                                                                                            |     | 11 (2.2)   |
| Retired                                                                                                                     |     | 1 (0.2)    |
| Staying at home / homemaker                                                                                                 |     | 10 (2.0)   |
| Disabled                                                                                                                    |     | 3 (0.6)    |
| Enrolled in school/college/university                                                                                       |     | 4 (0.8)    |
| Where is your partner working? (Select all that apply)                                                                      | 260 |            |
| Still going to their workplace                                                                                              |     | 159 (61.2) |
| Working from home                                                                                                           |     | 101 (38.8) |
| <b>Financial difficulties (past 2 weeks)</b>                                                                                |     |            |
| To what degree have changes related to the Coronavirus/COVID-19 pandemic created financial problems for you or your family? | 438 |            |
| Not at all                                                                                                                  |     | 217 (49.5) |
| Slightly                                                                                                                    |     | 118 (26.9) |
| Moderately                                                                                                                  |     | 59 (13.5)  |
| Very                                                                                                                        |     | 29 (6.6)   |
| Extremely                                                                                                                   |     | 15 (3.4)   |
| Which one of the following best describes your financial situation at this point in the pandemic?                           | 437 |            |
| Living comfortably                                                                                                          |     | 124 (28.4) |
| Doing alright                                                                                                               |     | 207 (47.4) |
| Just getting by                                                                                                             |     | 77 (17.6)  |
| Finding it quite difficult                                                                                                  |     | 19 (4.3)   |
| Finding it very difficult                                                                                                   |     | 10 (2.3)   |
| Have you had difficulties paying: (select all that apply)?                                                                  | 497 |            |
| Mortgage or rent or other loan re-payments                                                                                  |     | 61 (12.3)  |
| Household bills (utilities/phone/internet)                                                                                  |     | 67 (13.5)  |
| Food                                                                                                                        |     | 29 (5.8)   |
| Healthcare/Prescription medications                                                                                         |     | 17 (3.4)   |
| Home, car or other insurance                                                                                                |     | 41 (8.3)   |
| No difficulties                                                                                                             |     | 338 (68.0) |
| Difficulties paying one or more bills                                                                                       | 497 | 438 (88.1) |

|                                                                                     |     |            |
|-------------------------------------------------------------------------------------|-----|------------|
| Number of bills with difficulty paying                                              | 497 |            |
| 0                                                                                   |     | 59 (11.9)  |
| 1                                                                                   |     | 374 (75.3) |
| 2                                                                                   |     | 33 (6.6)   |
| 3                                                                                   |     | 17 (3.4)   |
| 4                                                                                   |     | 8 (1.6)    |
| 5                                                                                   |     | 6 (1.2)    |
| To what degree are you concerned about the stability of your housing situation?     | 437 |            |
| Not at all                                                                          |     | 253 (57.9) |
| Slightly                                                                            |     | 125 (28.6) |
| Moderately                                                                          |     | 31 (7.1)   |
| Very                                                                                |     | 20 (4.6)   |
| Extremely                                                                           |     | 8 (1.8)    |
| How often have you felt focused and productive in your work and/or domestic duties? | 436 |            |
| Almost never                                                                        |     | 22 (5.1)   |
| Rarely                                                                              |     | 48 (11.0)  |
| Sometimes                                                                           |     | 150 (34.4) |
| Often                                                                               |     | 158 (36.2) |
| Almost always                                                                       |     | 58 (13.3)  |

All values are presented as the number (n) and percent of respondents (%) who selected each response for categorical variables.

**Supplementary Table S2: Daily activities prior to and during the COVID-19 pandemic**

| Measure                                                                                                                             | n   | Prior to pandemic                                                | During pandemic                                                  | p*      |
|-------------------------------------------------------------------------------------------------------------------------------------|-----|------------------------------------------------------------------|------------------------------------------------------------------|---------|
| Sleep                                                                                                                               |     |                                                                  |                                                                  |         |
| Hours slept (weekdays)<br>Less than 6 hours<br>6-8 hours<br>8-10 hours<br>10-12 hours<br>12+ hours                                  | 476 | 2 (0.5%)<br>42 (9.0%)<br>193 (40.5%)<br>234 (49%)<br>5 (1%)      | 2 (0.0%)<br>38 (8.5%)<br>198 (44.5%)<br>200 (45.0%)<br>12 (2.5%) | 0.23    |
| Hours slept (weekends)<br>Less than 6 hours<br>6-8 hours<br>8-10 hours<br>10-12 hours<br>12+ hours                                  | 476 | 3 (0.5%)<br>31 (6.5%)<br>195 (41%)<br>239 (50%)<br>8 (2%)        | 3 (0.5%)<br>26 (6.0%)<br>194 (44.0%)<br>208 (47.0%)<br>12 (2.5%) | 0.12    |
| Bedtime (weekdays)<br>Before 8pm<br>8pm-10pm<br>10pm-12am<br>After midnight                                                         | 476 | 203 (43%)<br>247 (52%)<br>25 (5%)<br>1 (0%)                      | 142 (32%)<br>258 (58%)<br>37 (8%)<br>6 (2%)                      | <0.0001 |
| Bedtime (weekends)<br>Before 8pm<br>8pm-10pm<br>10pm-12am<br>After midnight                                                         | 476 | 136 (28%)<br>271 (57%)<br>60 (13%)<br>9 (2%)                     | 114 (26%)<br>241 (54%)<br>76 (17%)<br>12 (3%)                    | <0.0001 |
| Exercise                                                                                                                            |     |                                                                  |                                                                  |         |
| Days of exercise (per week)<br>None<br>1-2 days<br>3-4 days<br>5-6 days<br>Daily                                                    | 475 | 62 (13%)<br>73 (15%)<br>128 (27%)<br>73 (15%)<br>139 (29%)       | 64 (14.5%)<br>124 (28%)<br>94 (21%)<br>62 (14%)<br>99 (22.5%)    | <0.0001 |
| Days with time spent outside (per week)<br>None<br>1-2 days<br>3-4 days<br>5-6 days<br>Daily                                        | 476 | 14 (3%)<br>51 (11%)<br>83 (17%)<br>101 (21%)<br>227 (48%)        | 23 (5%)<br>91 (20.5%)<br>97 (22%)<br>78 (17.5%)<br>154 (35%)     | <0.0001 |
| Screen time                                                                                                                         |     |                                                                  |                                                                  |         |
| TV/digital media use (including Netflix, YouTube, web surfing)<br>None<br>Under 1 hour<br>1-3 hours<br>4-6 hours<br>6 or more hours | 473 | 26 (5.5%)<br>148 (31.5%)<br>267 (56.5%)<br>25 (5.5%)<br>7 (1.5%) | 16 (3.5%)<br>75 (17%)<br>239 (54%)<br>84 (19%)<br>29 (6.5%)      | <0.0001 |

|                                                                                                   |     |            |             |         |
|---------------------------------------------------------------------------------------------------|-----|------------|-------------|---------|
| <b>Social media use</b> (including Facetime, Facebook, Instagram, Snapchat, Twitter, TikTok etc.) |     |            |             |         |
| None                                                                                              |     |            |             |         |
| Under 1 hour                                                                                      | 473 | 379 (80%)  | 344 (77.5%) | 0.0001  |
| 1-3 hours                                                                                         |     | 43 (9%)    | 38 (8.5%)   |         |
| 4-6 hours                                                                                         |     | 46 (9.5%)  | 42 (9.5%)   |         |
| 6 or more hours                                                                                   |     | 4 (1%)     | 11 (2.5%)   |         |
|                                                                                                   |     | 1 (0.5%)   | 8 (2%)      |         |
| <b>Video games</b>                                                                                |     |            |             |         |
| None                                                                                              |     | 301 (64%)  | 253 (57%)   |         |
| Under 1 hour                                                                                      | 473 | 89 (19%)   | 76 (17%)    | <0.0001 |
| 1-3 hours                                                                                         |     | 74 (15.5%) | 84 (19%)    |         |
| 4-6 hours                                                                                         |     | 6 (1%)     | 22 (5%)     |         |
| 6 or more hours                                                                                   |     | 3 (0.5%)   | 8 (2%)      |         |

All values are presented as the number (n) and percent of respondents (%) who selected each response for categorical variables. A Stuart Maxwell test was used to test whether distributions are the same for categorical variables.

**Supplementary Table S3: Mean child and parent socio-emotional wellbeing scores by degree and laterality of child hearing loss**

| Mean wellbeing score*            | Pre-pandemic |      |              | During pandemic |              | Difference between pre and during pandemic |               |       |
|----------------------------------|--------------|------|--------------|-----------------|--------------|--------------------------------------------|---------------|-------|
|                                  | n            | Mean | 95% CI       | Mean            | 95% CI       | Mean difference                            | 95% CI        | p     |
| <b>Child</b>                     |              |      |              |                 |              |                                            |               |       |
| Mild                             | 101          | 0.83 | 0.70 to 0.96 | 1.21            | 1.06 to 1.37 | 0.38                                       | 0.25 to 0.52  | <0.01 |
| Moderate                         | 118          | 0.72 | 0.61 to 0.82 | 1.06            | 0.92 to 1.21 | 0.35                                       | 0.24 to 0.45  | <0.01 |
| Severe                           | 69           | 0.80 | 0.65 to 0.94 | 1.04            | 0.88 to 1.20 | 0.24                                       | 0.12 to 0.37  | <0.01 |
| Profound                         | 89           | 0.74 | 0.63 to 0.84 | 1.05            | 0.88 to 1.21 | 0.31                                       | 0.18 to 0.44  | <0.01 |
| ANSD                             | 34           | 0.58 | 0.47 to 0.69 | 0.91            | 0.67 to 1.16 | 0.33                                       | 0.13 to 0.53  | <0.01 |
| Permanent Conductive in. Atresia | 29           | 0.91 | 0.69 to 1.13 | 1.37            | 1.07 to 1.66 | 0.46                                       | 0.18 to 0.73  | <0.01 |
| <b>Parent</b>                    |              |      |              |                 |              |                                            |               |       |
| Mild                             | 100          | 1.10 | 0.98 to 1.22 | 1.52            | 1.35 to 1.68 | 0.42                                       | 0.28 to 0.56  | <0.01 |
| Moderate                         | 116          | 1.07 | 0.96 to 1.18 | 1.41            | 1.26 to 1.55 | 0.34                                       | 0.21 to 0.47  | <0.01 |
| Severe                           | 69           | 1.00 | 0.85 to 1.16 | 1.29            | 1.11 to 1.47 | 0.29                                       | 0.13 to 0.44  | <0.01 |
| Profound                         | 88           | 1.02 | 0.88 to 1.16 | 1.35            | 1.19 to 1.51 | 0.33                                       | 0.19 to 0.48  | <0.01 |
| ANSD                             | 34           | 1.12 | 0.87 to 1.37 | 1.52            | 1.19 to 1.85 | 0.40                                       | 0.15 to 0.65  | <0.01 |
| Permanent Conductive in. Atresia | 29           | 1.07 | 0.83 to 1.31 | 1.75            | 1.39 to 2.11 | 0.68                                       | 0.42 to 0.94  | <0.01 |
| <b>Bilateral hearing loss</b>    |              |      |              |                 |              |                                            |               |       |
| <b>Child</b>                     |              |      |              |                 |              |                                            |               |       |
| Mild                             | 78           | 0.80 | 0.60 to 0.67 | 1.24            | 1.07 to 1.41 | 0.44                                       | 0.28 to 0.60  | <0.01 |
| Moderate                         | 88           | 0.72 | 0.60 to 0.83 | 1.07            | 0.89 to 1.25 | 0.35                                       | 0.22 to 0.48  | <0.01 |
| Severe                           | 47           | 0.78 | 0.59 to 0.97 | 1.08            | 0.86 to 1.29 | 0.30                                       | 0.14 to 0.45  | <0.01 |
| Profound                         | 50           | 0.80 | 0.65 to 0.94 | 1.10            | 0.83 to 1.28 | 0.26                                       | 0.09 to 0.43  | <0.01 |
| ANSD                             | 14           | 0.51 | 0.36 to 0.65 | 0.77            | 0.45 to 1.08 | 0.26                                       | 0.03 to 0.49  | 0.03  |
| Permanent Conductive in. Atresia | 10           | 0.79 | 0.41 to 1.16 | 0.95            | 0.42 to 1.48 | 0.16                                       | -0.19 to 0.51 | 0.31  |
| <b>Parent</b>                    |              |      |              |                 |              |                                            |               |       |
| Mild                             | 77           | 1.10 | 0.97 to 1.24 | 1.59            | 1.42 to 1.77 | 0.49                                       | 0.32 to 0.66  | <0.01 |
| Moderate                         | 86           | 1.04 | 0.90 to 1.18 | 1.44            | 1.26 to 1.62 | 0.40                                       | 0.24 to 0.57  | <0.01 |
| Severe                           | 47           | 1.06 | 0.85 to 1.26 | 1.35            | 1.13 to 1.57 | 0.30                                       | 0.09 to 0.51  | <0.01 |
| Profound                         | 49           | 1.10 | 0.88 to 1.31 | 1.42            | 1.21 to 1.62 | 0.32                                       | 0.12 to 0.52  | 0.02  |
| ANSD                             | 14           | 1.01 | 0.49 to 1.52 | 1.38            | 0.82 to 1.93 | 0.37                                       | 0.02 to 0.71  | 0.03  |
| Permanent Conductive in. Atresia | 10           | 1.04 | 0.53 to 1.54 | 1.46            | 0.83 to 2.09 | 0.43                                       | -0.04 to 0.89 | 0.07  |

---

|                                  |    |      |              |      |              |      |               |       |
|----------------------------------|----|------|--------------|------|--------------|------|---------------|-------|
| <b>Unilateral hearing loss</b>   |    |      |              |      |              |      |               |       |
| <b>Child</b>                     |    |      |              |      |              |      |               |       |
| Mild                             | 14 | 0.92 | 0.54 to 1.30 | 1.19 | 0.67 to 1.70 | 0.27 | -0.08 to 0.62 | 0.12  |
| Moderate                         | 22 | 0.74 | 0.46 to 1.02 | 1.07 | 0.76 to 1.39 | 0.34 | 0.12 to 0.55  | <0.01 |
| Severe                           | 14 | 0.83 | 0.59 to 1.12 | 0.88 | 0.48 to 1.18 | 0.04 | -0.21 to 0.30 | 0.71  |
| Profound                         | 37 | 0.66 | 0.50 to 0.81 | 1.04 | 0.77 to 1.31 | 0.39 | 0.19 to 0.58  | <0.01 |
| ANSD                             | 19 | 0.63 | 0.45 to 0.80 | 0.93 | 0.58 to 1.29 | 0.31 | 0.01 to 0.61  | 0.04  |
| Permanent Conductive in. Atresia | 19 | 0.97 | 0.68 to 1.27 | 1.59 | 1.24 to 1.93 | 0.61 | 0.23 to 0.99  | <0.01 |
| <b>Parent</b>                    |    |      |              |      |              |      |               |       |
| Mild                             | 14 | 1.13 | 0.72 to 1.53 | 1.44 | 0.81 to 2.07 | 0.31 | -0.04 to 0.67 | 0.08  |
| Moderate                         | 22 | 1.21 | 0.98 to 1.44 | 1.40 | 1.11 to 1.68 | 0.19 | -0.07 to .45  | 0.15  |
| Severe                           | 14 | 0.86 | 0.55 to 1.16 | 1.09 | 0.70 to 1.48 | 0.23 | -0.10 to 0.57 | 0.16  |
| Profound                         | 37 | 0.93 | 0.74 to 1.12 | 1.31 | 1.05 to 1.57 | 0.38 | 0.15 to 0.60  | <0.01 |
| ANSD                             | 19 | 1.20 | 0.91 to 1.49 | 1.55 | 1.11 to 1.98 | 0.35 | -0.02 to 0.71 | 0.06  |
| Permanent Conductive in. Atresia | 19 | 1.09 | 0.79 to 1.38 | 1.90 | 1.43 to 2.37 | 0.82 | 0.49 to 1.14  | <0.01 |

---

\*Mean wellbeing score is generated using the CRISIS emotions/worries 8-item summary score which includes 8 questions rated on a 5-point Likert scale between 0 and 4, with 0 representing the best outcome (i.e. least sad) and 4 representing the poorest outcome (i.e. most sad). P-values are from a paired t-test comparing the three months before the pandemic (pre pandemic) to the last two weeks (during the pandemic).
